# Supplementary material for: A Structural Equation Model Demonstrating the Relationship between Food Safety Background, Knowledge, Attitudes and Behaviour among Swedish Students
Source: MDPI journal article supplement (doi:10.3390/foods11111595), 2022-05-28
Supplement: s1 [file s1]

Supplemental Table S1: Respondents attitudes towards food safety behavior

|                |                                                                                                                                                                                                                                                                                                                                       |
|----------------|---------------------------------------------------------------------------------------------------------------------------------------------------------------------------------------------------------------------------------------------------------------------------------------------------------------------------------------|
| A <sub>1</sub> | <b>Question: To wash your hands carefully before cooking food is for you?</b><br>Responders ( <i>n</i> = 606): Not at all important (0.3%); Not especially important (3.6%); Either important nor unimportant (4.6%) Rather important (29.7%); <b>Very important (61.7%)</b> I have never been in this situation (0%).                |
| A <sub>2</sub> | <b>Question: To wash your hands carefully after handling raw, minced meat is for you?</b><br>Responders ( <i>n</i> = 606): Not at all important (0.5%); Not especially important (1.2%); Either important nor unimportant (3.5%) Rather important (18.8%); <b>Very important (64.9%)</b> I have never been in this situation (11.2%). |
| A <sub>3</sub> | <b>Question: To wash your hands carefully after handling raw chicken is for you?</b><br>Responders ( <i>n</i> = 606): Not at all important (0.3%); Not especially important (0.2%); Either important nor unimportant (0.5%) Rather important (5.1%); <b>Very important (82.3%)</b> I have never been in this situation (11.6%).       |
| A <sub>4</sub> | <b>Question: To wash your hands carefully after visiting the toilet is for you?</b><br>Responders ( <i>n</i> = 606): Not at all important (0.0%); Not especially important (0.0%); Either important nor unimportant (0.8%) Rather important (8.9%); <b>Very important (90.3%)</b> I have never been in this situation (0%).           |
| A <sub>5</sub> | <b>Question: To wash your hands carefully after handling raw eggs is for you?</b><br>Responders ( <i>n</i> = 606): Not at all important (4.8%); Not especially important (13.7%); Either important nor unimportant (24.6%) <b>Rather important (27.4%)</b> ; Very important (22.4%) I have never been in this situation (4.6%).       |
| A <sub>6</sub> | <b>Question: To cool leftovers within 4 hours from cooking is for you?</b><br>Responders ( <i>n</i> = 606): Not at all important (3.6%); Not especially important (7.6%); Either important nor unimportant (30.7%) <b>Rather important (31.2%)</b> ; Very important (26.7%) I have never been in this situation (0.2%).               |
| A <sub>7</sub> | <b>Question How do you evaluate your level of food safety knowledge?</b><br>Responders ( <i>n</i> = 606): Very good (9.1%); <b>Rather good (52.6%)</b> ; Neither good nor bad (27.6%); Rather bad (8.4%); Very bad (1.7%); Do not know (0.7%).                                                                                        |
